# Supplementary material for: Monodisperse Porous Silicon Spheres as Anode Materials for Lithium Ion Batteries
Source: PubMed Central journal article supplement — Sci Rep. 2015 Mar 5;5:8781. doi: 10.1038/srep08781 (PMC4350083; doi:10.1038/srep08781), 2015-03-05
Supplement: srep08781-s1.pdf [file srep08781-s1.pdf]

## SUPPORTING INFORMATION FOR

Energy storage, Lithium Ion Batteries, Electrochemistry, Silicon, Porous

Correspondence and requests for materials should be addressed to  
C. S. O. ([cozkan@engr.ucr.edu](mailto:cozkan@engr.ucr.edu))

# Monodisperse Porous Silicon Spheres as Anode Materials for Lithium Ion Batteries

*Wei Wang, Zachary Favors, Robert Ionescu, Rachel Ye, Hamed Hosseini Bay, Mihrimah Ozkan  
and Cengiz S. Ozkan\**

[\*] W. Wang, Z. Favors, H. H. Bay, R. Ye, Prof. C. S. Ozkan  
Materials Science and Engineering Program, Department of Mechanical Engineering,  
Department of Electrical Engineering, University of California  
Riverside, CA 92521 (USA)  
R. Ionescu, Prof. M. Ozkan  
Department of Electrical Engineering, Department of Chemistry, University of California,  
Riverside, CA 92521 (USA)

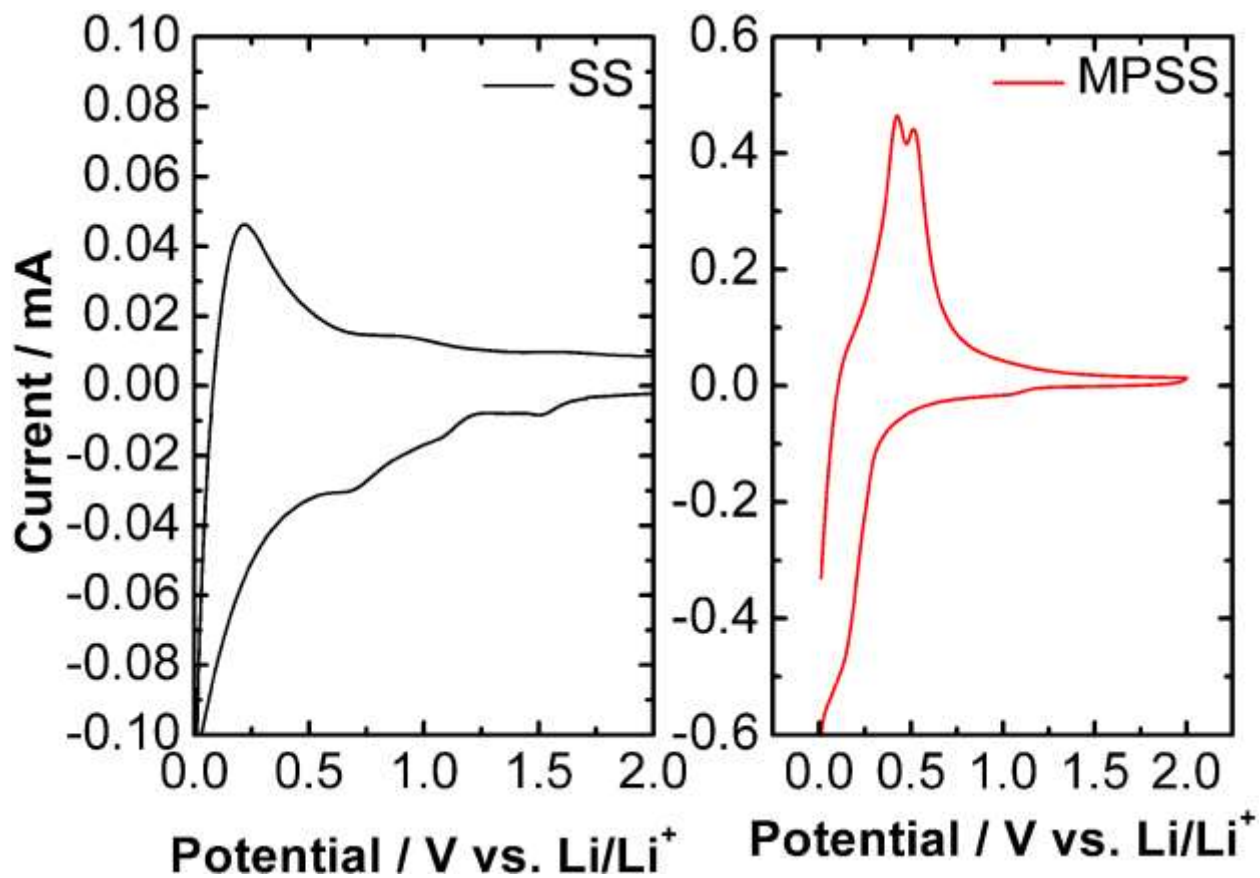

**Figure S1.** Cyclic voltammetry characteristic of the SS and MPSS based LIB anode. Scan rate: 0.2 mV sec<sup>-1</sup>.

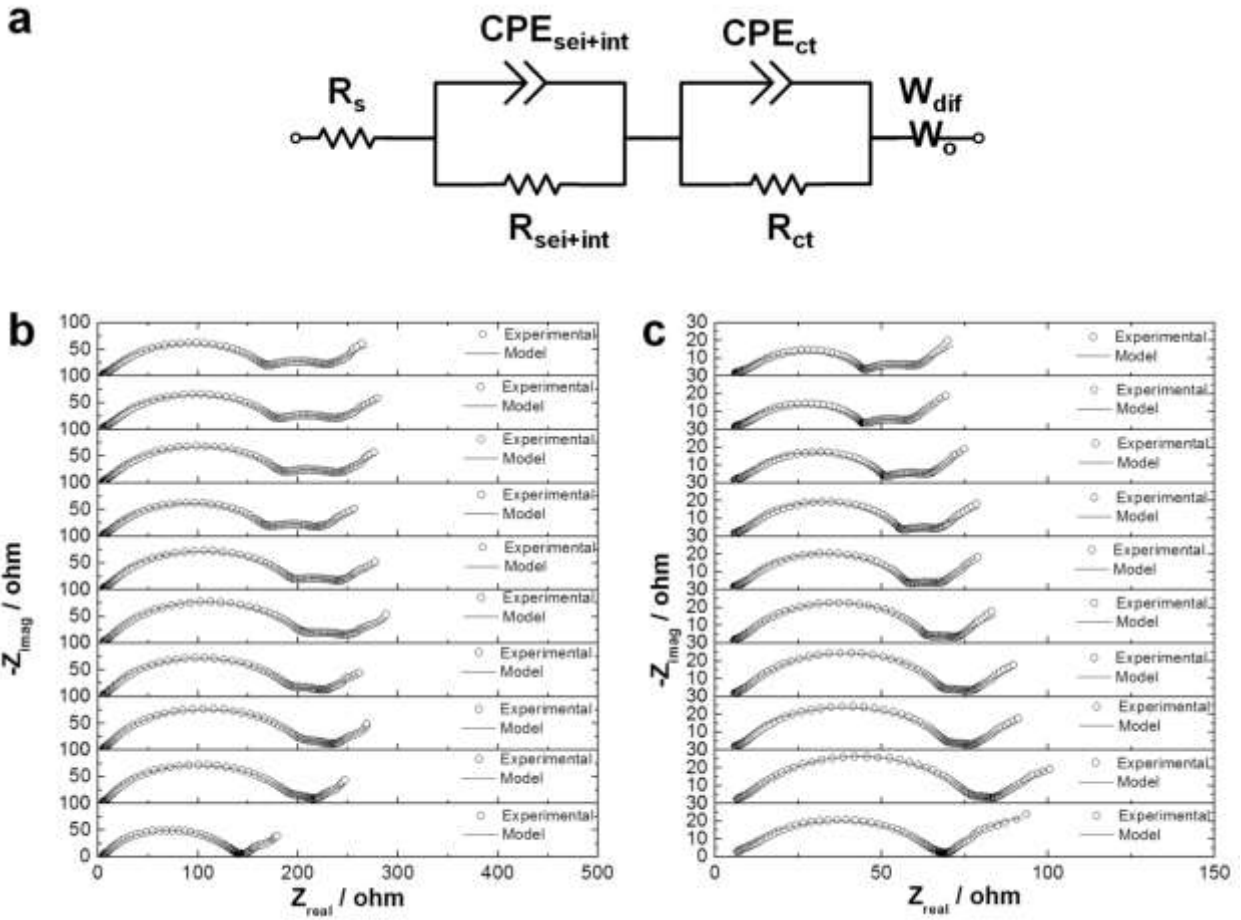

**Figure S2.** (a) The equivalent circuit used to model the EIS spectra. (b) Experimental and model fitted EIS plots of the MPSS electrodes (with carbon black). (c) Experimental and model fitted EIS plots of the MPSS-CNT electrodes (with 2wt% CNTs).
